# Supplementary material for: Efficient non-viral gene delivery mediated by nanostructured calcium carbonate in solution-based transfection and solid-phase transfection
Source: Royal Society of Chemistry journal article supplement (doi:10.1039/c1mb05147d), 2011-07-20
Supplement: c1mb05147d.pdf [file c1mb05147d.pdf]

Supporting Information

**Efficient non-viral gene delivery mediated by nanostructured calcium carbonate  
in solution-based transfection and solid-phase transfection**

Si Chen, Feng Li, Ren-Xi Zhuo, and Si-Xue Cheng\*

*Key Laboratory of Biomedical Polymers of Ministry of Education, Department of  
Chemistry, Wuhan University, Wuhan 430072, P. R. China*

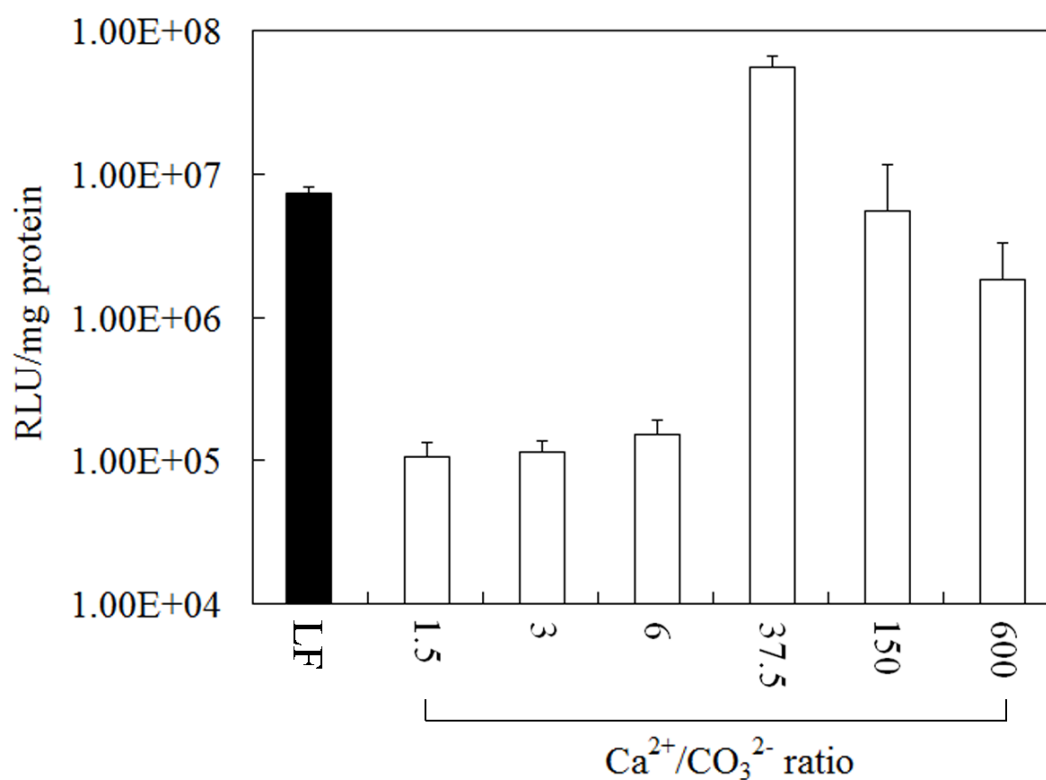

**Fig. S1** Luciferase expression in HepG2 cells mediated by CaCO<sub>3</sub>/DNA co-precipitates with different Ca<sup>2+</sup>/CO<sub>3</sub><sup>2-</sup> ratios in solution-based transfection as compared with Lipofectamine 2000 (LF). (The comparison between the CaCO<sub>3</sub>/DNA co-precipitates at Ca<sup>2+</sup>/CO<sub>3</sub><sup>2-</sup> ratio of 37.5 and LF shows p<0.05.)

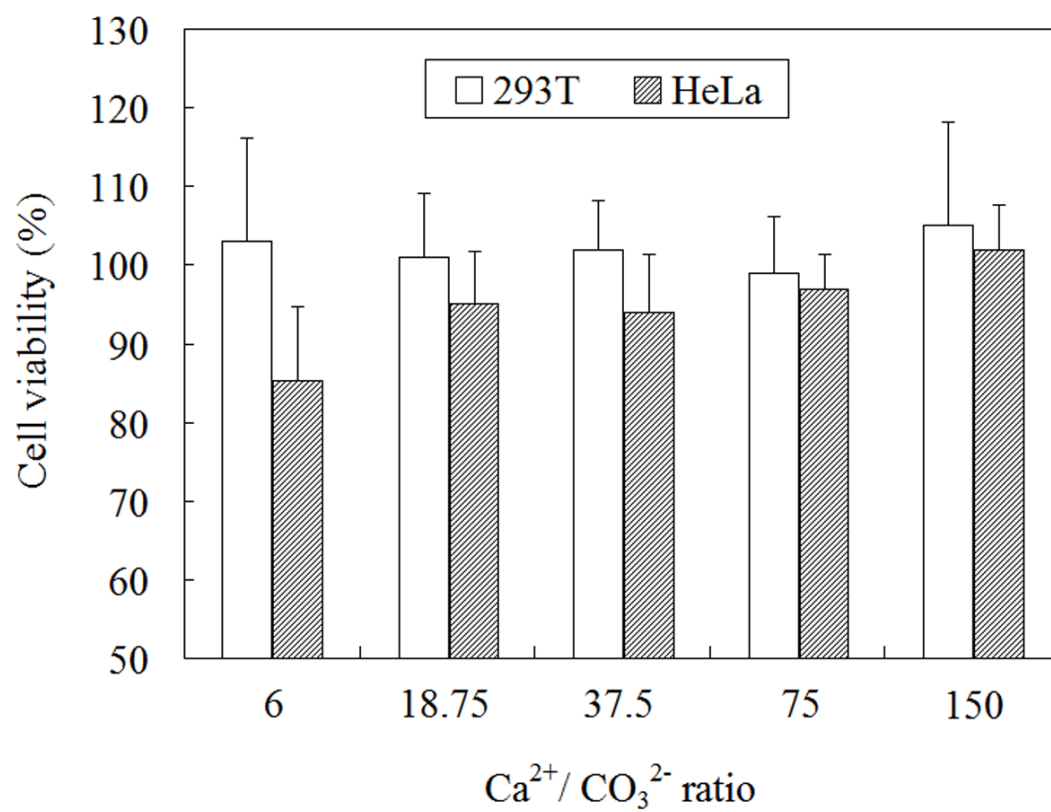

**Fig. S2** Cell viability after transfection mediated by CaCO<sub>3</sub>/DNA co-precipitates.

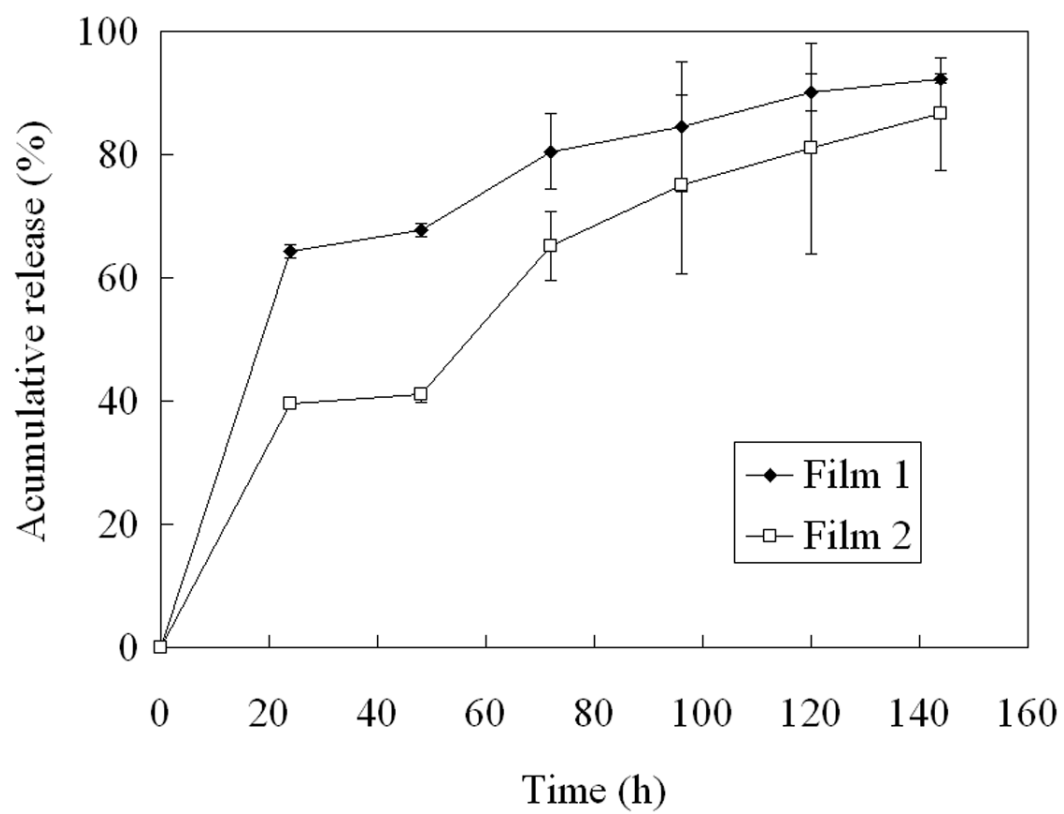

**Fig. S3** DNA release from CaCO<sub>3</sub>/DNA co-precipitates loaded films.
